# Supplementary material
Source: PubMed Central journal article supplement (PMC3416323)

**Supplemental Fig. 1. Heat map of differential gene expression induced by KIN 101.** MRC5 cells were treated with a negative control compound, KIN 101 (10  $\mu$ M), or infected with Sendai virus (positive control). Shown are genes that exhibited  $\geq 2$ -fold change ( $P \leq 0.01$ ) in expression compared with cells treated with 0.5% DMSO. Red, up-regulation; green, down-regulation.

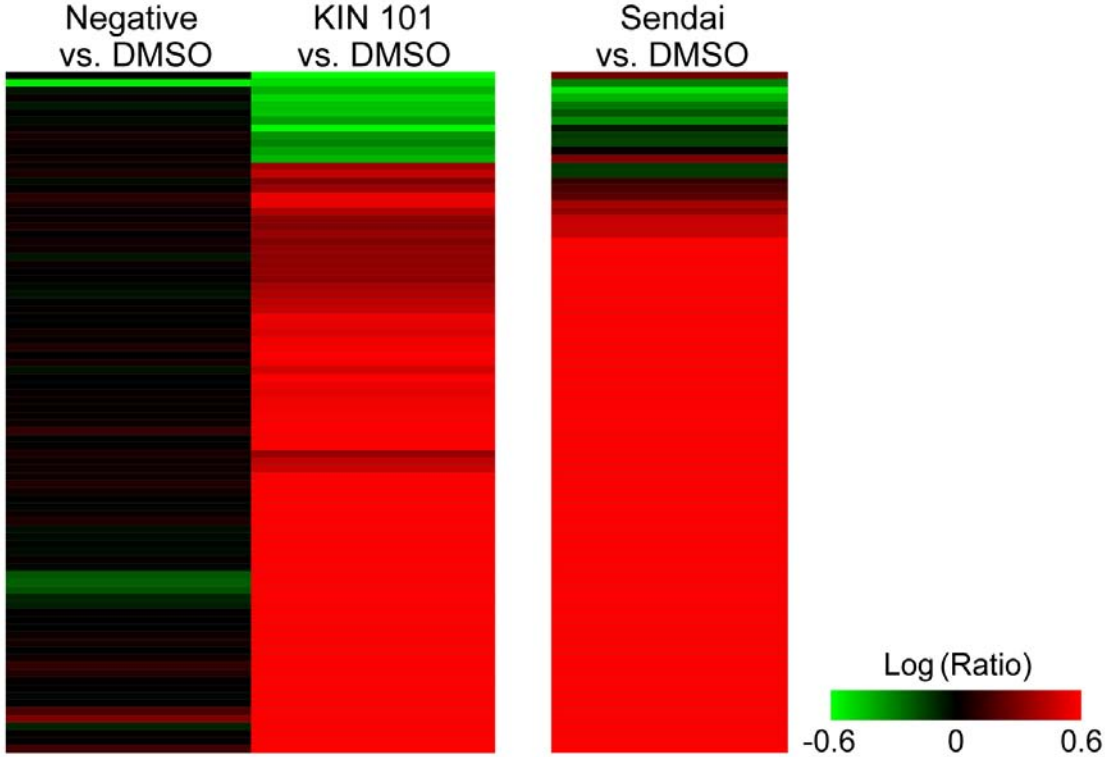

Supplement: supp_86.13.7334_FigS1.pdf [file supp_86.13.7334_FigS1.pdf]
